# Supplementary material for: Efficient pathways to improve electrode performance of P′2 Na2/3MnO2 for sodium batteries
Source: Royal Society of Chemistry journal article supplement (doi:10.1039/d4cc04719b), 2024-11-29
Supplement: d4cc04719b1.pdf [file d4cc04719b1.pdf]

**Supplementary Information for**  
**Efficient Pathways to Improve Electrode Performance of**  
**P'2 Na<sub>2/3</sub>MnO<sub>2</sub> for Sodium Batteries**

Yosuke Ugata,<sup>†, ‡, #</sup> Tomohiro Kuriyama,<sup>†, #</sup> and Naoaki Yabuuchi<sup>\*, †, ‡</sup>

<sup>†</sup>Department of Chemistry and Life Science, Yokohama National University, 79-5 Tokiwadai,  
Hodogaya-ku, Yokohama 240-8501, Japan

<sup>‡</sup>Advanced Chemical Energy Research Center (ACERC), Institute of Advanced Sciences, Yokohama  
National University, 79-5 Tokiwadai, Hodogaya-ku, Yokohama 240-8501, Japan

**\*CORRESPONDING AUTHOR**

E-mail: yabuuchi-naoaki-pw@ynu.ac.jp (N.Y.)

<sup>#</sup> Y.U. and T.K. contributed equally to this work.

## Supporting Experimental Section

*Electrochemical Characterization of P'2 Na<sub>2/3</sub>MnO<sub>2</sub>*: The composite electrode consisting of active material (P'2 Na<sub>2/3</sub>MnO<sub>2</sub> powder), acetylene black (AB, HS-100, Denka), and poly(vinylidene fluoride) (KF 1100; Kureha Co. Ltd.) was pasted onto Al foil as a current collector by slurry coating method, and then dried under vacuum and further heated at 120 °C in a vacuum for 2 h. The composition for the composite electrode is Na<sub>2/3</sub>MnO<sub>2</sub>:AB:PVdF = 80:10:10 in wt%, and the typical mass loading of the active material is 3 – 5 mg cm<sup>-2</sup>. Metallic sodium (FUJIFILM Wako Pure Chemical) was used as a negative electrode. The electrolyte solution used was 1 M NaPF<sub>6</sub> in propylene carbonate (PC) (Kishida Chemical). A porous glass fiber filter (GB-100R, Advantec) was used as a separator placed between the positive and negative electrodes. The two-electrode cells were assembled in an Ar-filled glove box and cycled at room temperature.

## Supporting Figures

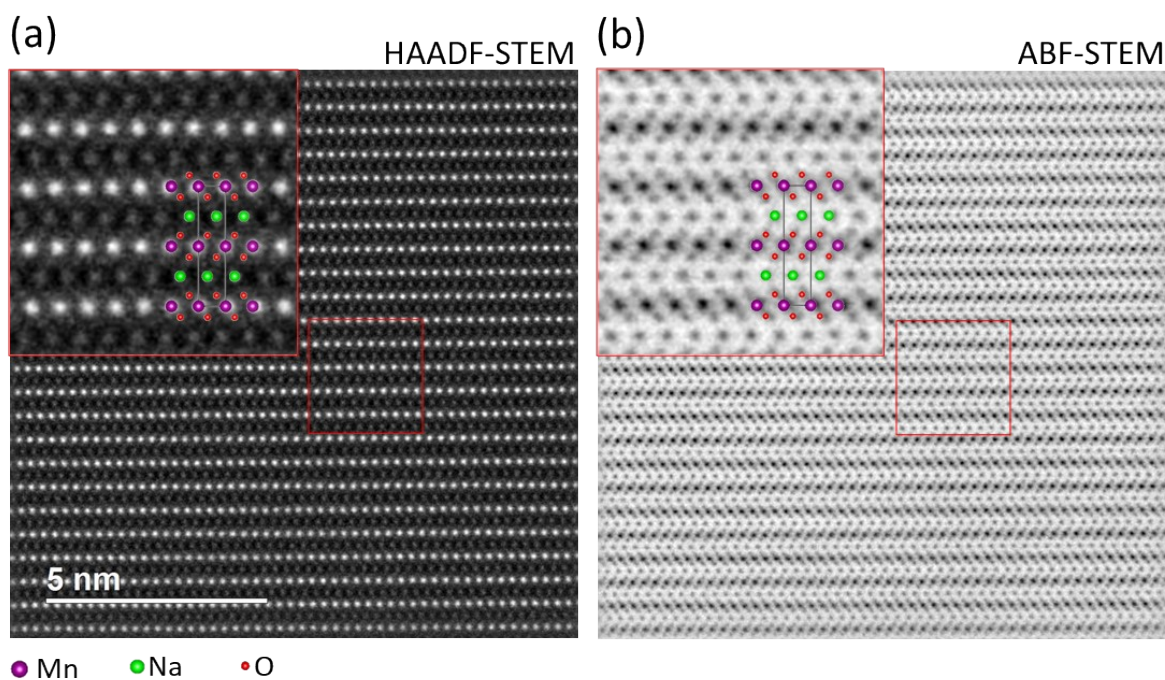

**Figure S1.** HAADF- and (e) ABF-STEM images along [100] of Na<sub>2/3</sub>MnO<sub>2</sub>.

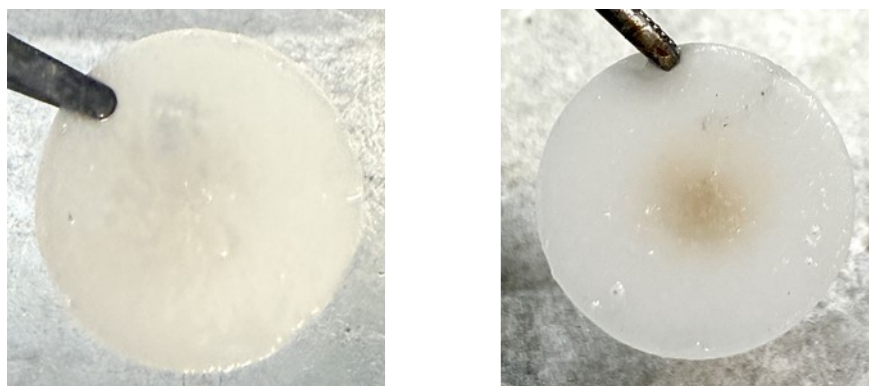

**Figure S2.** Photographs of the glass filters in Na/Na<sub>2/3</sub>MnO<sub>2</sub> cells after 30 cycles in the voltage ranges of (left) 2.4–4.0 V and (right) 1.5–4.0 V at a rate of 10 mA g<sup>-1</sup>.

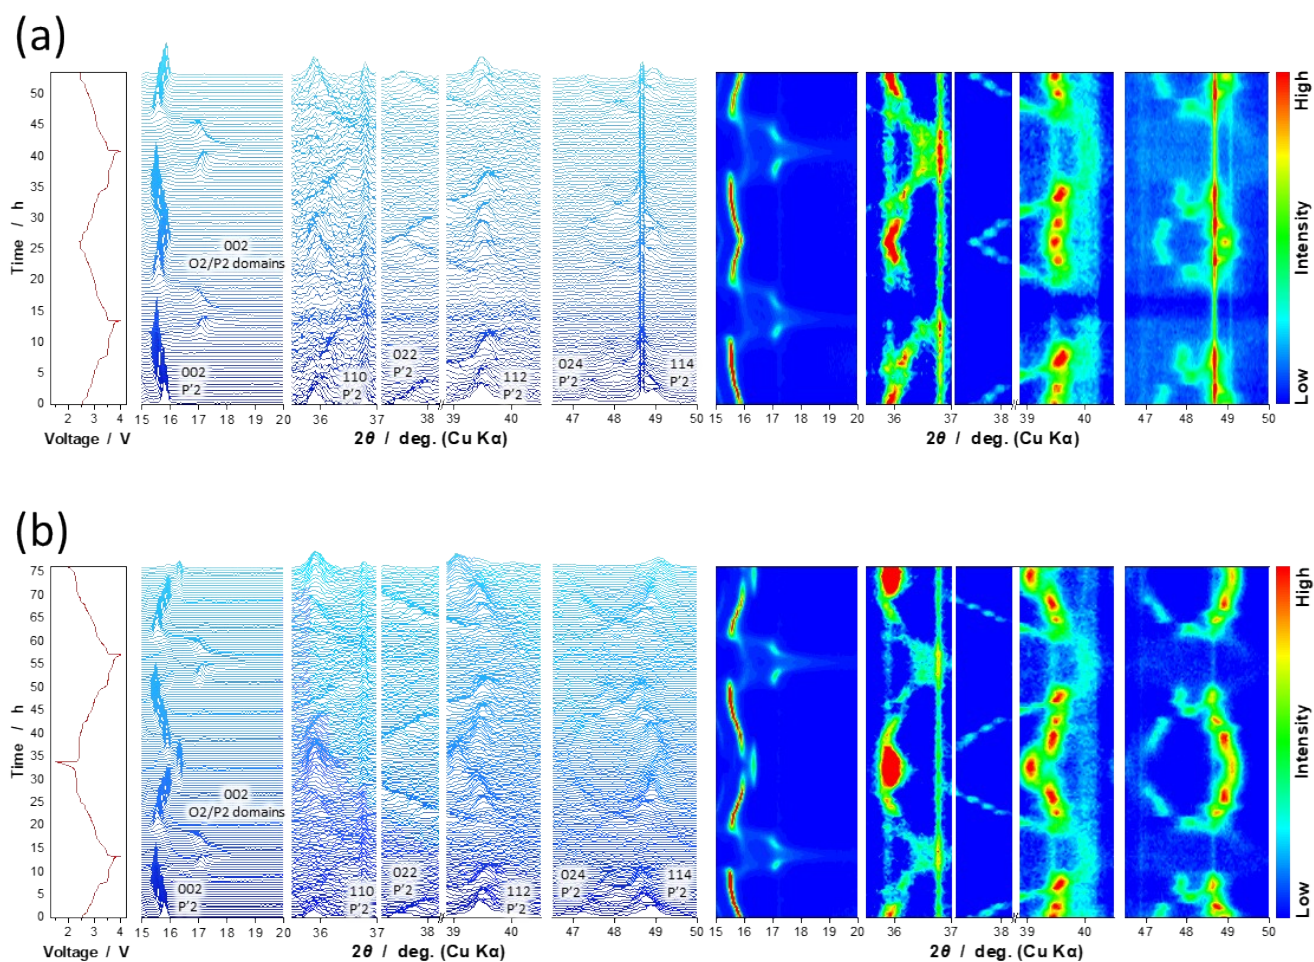

**Figure S3.** *In-situ* XRD patterns and corresponding contour plots of P'2 Na<sub>2/3</sub>MnO<sub>2</sub> during the initial two cycles in the voltage ranges of (a) 2.4–4.0 V and (b) 1.5–4.0 V at a rate of 10 mA g<sup>-1</sup>.

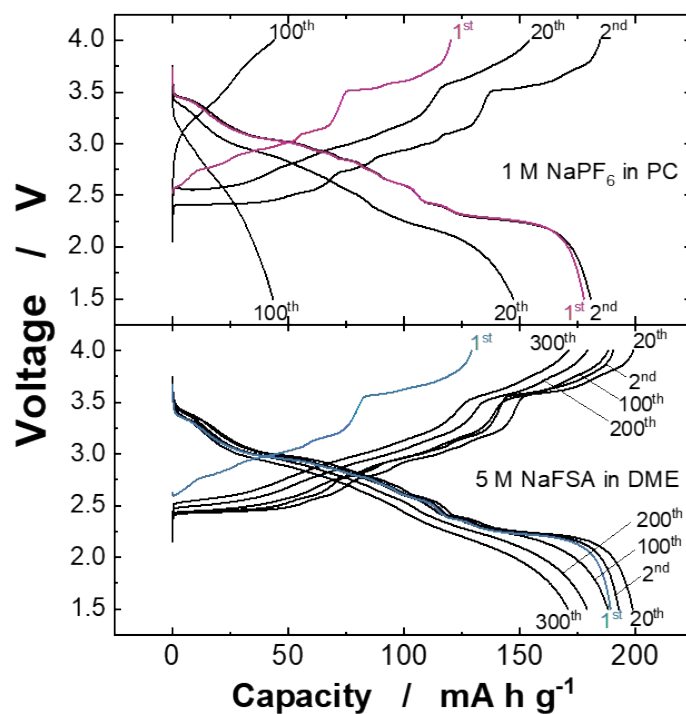

**Figure S4.** Charge/discharge curves of P'2  $\text{Na}_{2/3}\text{MnO}_2$  cycled with 1 M  $\text{NaPF}_6$  in PC and 5 M NaFSA in DME electrolytes in the voltage range of 1.5–4.0 V at a rate of  $50 \text{ mA g}^{-1}$ .

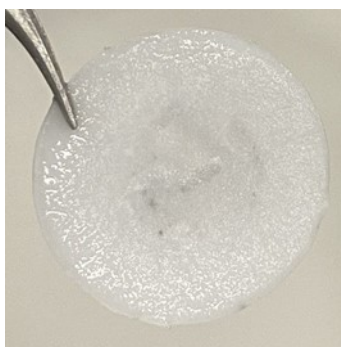

**Figure S5.** A photograph of the glass filter in a  $\text{Na}/\text{Na}_{2/3}\text{MnO}_2$  cell with 5 M NaFSA in DME electrolyte after 200 cycles in the voltage range of 1.5–4.0 V at a rate of  $50 \text{ mA g}^{-1}$ .

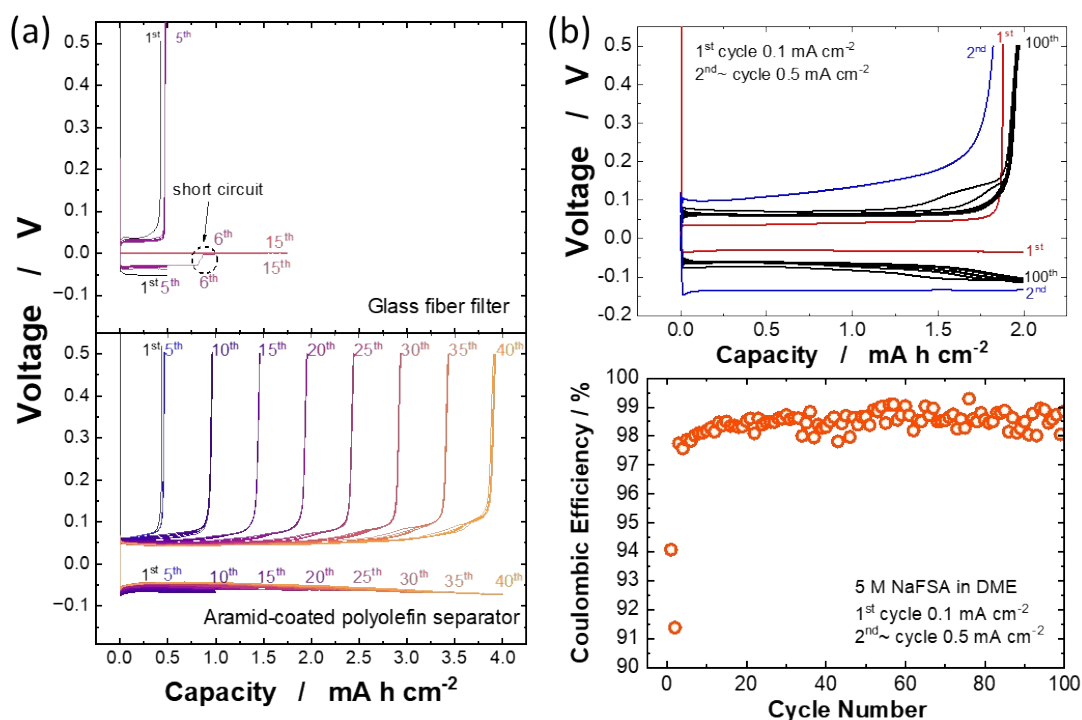

**Figure S6.** (a) Chronopotentiometric curves of Na deposition/stripping in Na/Cu cells with a glass fiber filter and aramid-coated polyolefin separator measured at various Na disposition capacities at a current density of  $0.5 \text{ mA cm}^{-2}$ . (b) Cycle performance of the Na/Cu cell with the aramid-coated polyolefin membrane cycled at  $0.5 \text{ mA cm}^{-2}$  after an initial cycle at  $0.1 \text{ mA cm}^{-2}$ . 5 M NaFSA in DME electrolyte was used as an electrolyte solution.

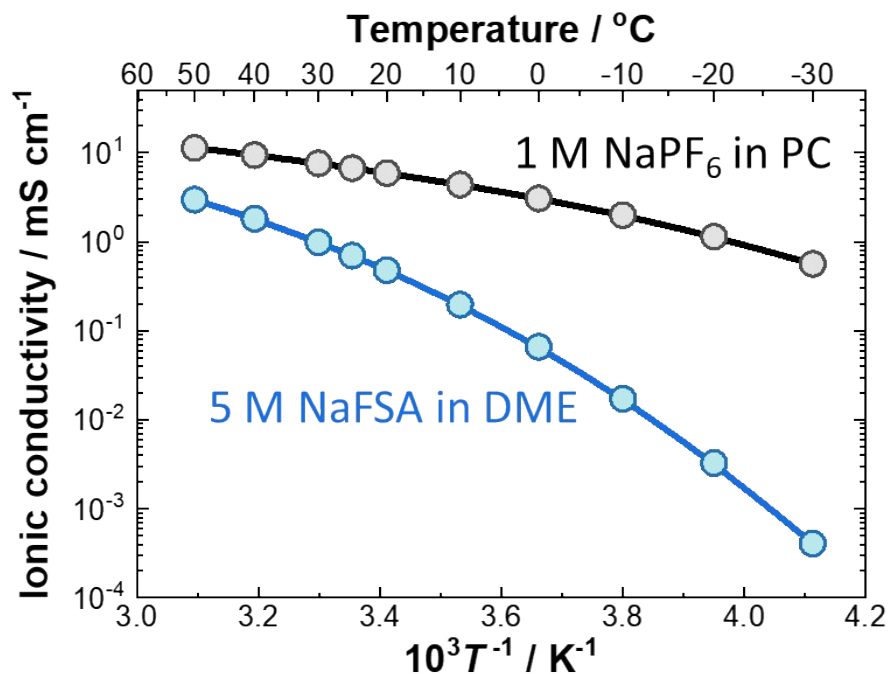

**Figure S7.** Arrhenius plots of ionic conductivity of 1 M NaPF<sub>6</sub> in PC and 5 M NaFSA in DME electrolytes.
